# Supplementary material
Source: PubMed Central journal article supplement (PMC2970866)
Supplement: supp_182_7_970__1.pdf [file supp_182_7_970__1.pdf]

# **Nontuberculous Mycobacterial Lung Disease Prevalence: A Large-Linked Database Approach at Four Integrated Healthcare Delivery Systems**

D. Rebecca Prevots, Pamela A. Shaw , Daniel Strickland, Lisa A. Jackson, Marsha A. Raebel, Mary Ann Blosky, Ruben Montes de Oca, Yvonne R. Shea, Amy E. Seitz, Steven M. Holland, Kenneth N. Olivier

## **Online supplement**

### Methods:

#### *Search for ICD9 codes*

To identify underlying chronic conditions as well as associated comorbid conditions we used two methods for identifying relevant ICD9 codes: 1) searching through all available datasets for the study period, to identify codes ever assigned during that time for a particular conditions, and 2) searching for a defined time period before and after the specimen collection date (3 months before and 6 months after). The rationale for these strategies was that a patient may have a chronic condition, but if that condition is not managed at a particular visit, then the relevant code may not be assigned. To ensure the most comprehensive search for both underlying chronic conditions as well as comorbid conditions at the time of specimen collection we used both these approaches.

#### **ICD9 Codes to search for NTM and comorbidities**

011.5 Tuberculous bronchiectasis

011 Pulmonary tuberculosis

012 Other respiratory tuberculosis

031.0 Pulmonary NTM

031.1 Cutaneous NTM

031.2 Disseminated NTM

031.8 Other specified mycobacterial diseases

031.9 Unspecified diseases due to mycobacteria

042 Human immunodeficiency virus [HIV] disease

114. Coccidiomycosis

115 Histoplasmosis

117.3 Aspergillosis

135 Sarcoidosis

140-239 (excluding 173.) Other Malignancies

162 Malignant neoplasm of trachea, bronchus, and lung

277.0 Cystic fibrosis

279 Disorders involving the immune mechanism

424.0 Mitral valve disorders<sup>1</sup>

490. Bronchitis not specified

491.0 Simple chronic bronchitis

491.2 Obstructive chronic bronchitis

491.20 Chronic bronchitis without exacerbation

491.9 unspecified chronic bronchitis

492.0 Emphysema

492.8 Asthma, unspecified

493.0 Asthma

493.1 Intrinsic asthma (late onset asthma)

493.2 Chronic obstructive asthma

493.8 Asthma, other forms

493.82 Cough variant asthma

493.9 Asthma, unspecified

494 Bronchiectasis

495.9 Hypersensitivity pneumonia

496 Chronic airway obstruction, not elsewhere classified

516.3 Idiopathic pulmonary fibrosis

518.6 Allergic bronchopulmonary aspergillosis

530.0 Achalasia

530.11 Reflux esophagitis

530.81 Gastroesophageal reflux

737.3 Kyphoscoliosis and scoliosis<sup>1</sup>

737.4 Curvature of spine associated with other conditions<sup>1</sup>

738.3 Acquired deformity of chest and rib<sup>1</sup>

748.61 Congenital bronchiectasis

754.2 Congenital musculoskeletal deformity of spine<sup>1</sup>

754.81 Pectus excavatum<sup>1</sup>

759.3 Situs inversus (marker for primary ciliary dyskinesia)

<sup>1</sup>Search for this conducted KPCO only
